# Supplementary material for: Conformation driven in situ interlock: from discrete metallocycles to infinite polycatenanes
Source: Royal Society of Chemistry journal article supplement (doi:10.1039/c5cc04854k), 2015-01-01
Supplement: c5cc04854k1.pdf [file c5cc04854k1.pdf]

## Supporting information

### Conformation driven *in situ* interlock: from discrete metallocycles to infinite polycatenane

Hui Xue,<sup>a,b</sup> Feilong Jiang,<sup>a</sup> Qihui Chen,<sup>\*a</sup> Daqiang Yuan,<sup>a</sup> Jiandong Pang,<sup>a,b</sup>  
Guangxun Lv,<sup>a,b</sup> Xiuyan Wan,<sup>a,b</sup> Linfeng Liang,<sup>a,b</sup> and Maochun Hong<sup>\*a</sup>

<sup>a</sup>State Key Laboratory of Structure Chemistry, Fujian Institute of Research on the  
Structure of Matter, Chinese Academy of Sciences, Fuzhou, Fujian, 350002, China

<sup>b</sup>University of Chinese Academy of Sciences, Beijing, 10049, China

#### Content

- (1) The synthesis process of ligand.
- (2) The process of self-assembly of three different metallocycles.
- (3) The synthesis process of compounds 1, 2 and 3.
- (4) Table S1 Crystal data and refinement results for compounds 1-4.
- (5) Table S2 Selected Bond Lengths (Å) and Bond Angles (°) for compound 1.
- (6) Table S3 Selected Bond Lengths (Å) and Bond Angles (°) for compound 2.
- (7) Table S4 Selected Bond Lengths (Å) and Bond Angles (°) for compound 3.
- (8) Table S5 Selected Bond Lengths (Å) and Bond Angles (°) for compound 4.

## Experimental methods

General: All of reagents were commercially available and used as purchased. C, H, and N microanalyses were measured using an elemental Vairo EL analyzer, <sup>1</sup>H NMR spectra were recorded at Bruker AM-400 (400 MHz) spectrometer, IR spectra were recorded on a Shimadzu IR-440 spectrometer.

### The synthesis process of ligand (L)

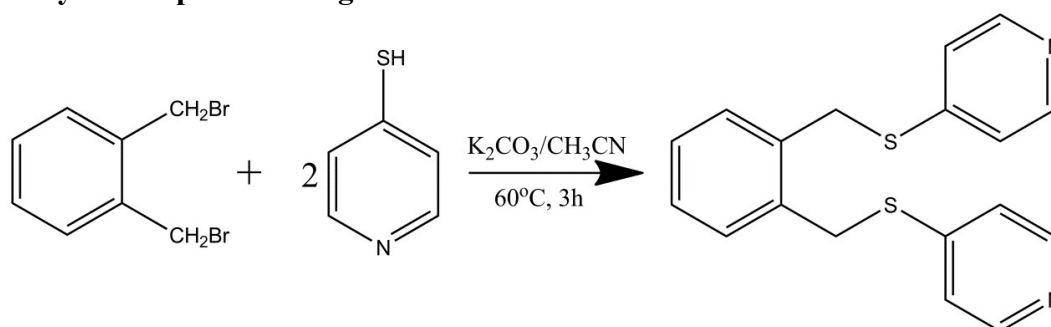

A solution of 1,2-bis(bromomethyl) benzene (1.32g, 5mmol), pyridine-4-thiol (1.11g, 10mmol) and potassium carbonate (1.38g, 10mmol) in 50ml MeCN was heated to 60°C for 3h with vigorous stirring. After cooling, the pale fuchsia solution was filtered. Removal of the solvent gave an oil, which afforded a fuchsia powder on recrystallization from CH<sub>2</sub>Cl<sub>2</sub>-Et<sub>2</sub>O-hexane (yield: 1.41g, 84%). <sup>1</sup>H NMR (400 MHz, CDCl<sub>3</sub>) δ: 8.44 (dd, *J* = 4.9, 1.5 Hz, 4H, Py-H), 7.44 (dd, *J* = 5.5, 3.5 Hz, 2H, Ph-H), 7.34 (dd, *J* = 5.5, 3.5 Hz, 2H, Ph-H), 7.26 (dd, *J* = 4.9, 1.5 Hz, 4H, Py-H), 4.41 (s, 4H, CH<sub>2</sub>). ESI-MS (*m/z*): 324 (M+H<sup>+</sup>).

### Self-assembly of three different metallocycles

#### [Hg<sub>2</sub>L<sub>2</sub>Cl<sub>4</sub>] metallocycle

The ligand L (16mg, 0.04mmol) and HgCl<sub>2</sub> (12mg, 0.04mmol) were put into CH<sub>3</sub>CN/H<sub>2</sub>O solution, and stirring this solution at room temperature for 1 hours, the white powder was obtained. ESI-MS confirmed that the metallocycle [Hg<sub>2</sub>L<sub>2</sub>Cl<sub>4</sub>] can be synthesized quickly, the 1154 peak corresponds to [Hg<sub>2</sub>L<sub>2</sub>Cl<sub>3</sub>]<sup>+</sup> in Fig S1.

#### [Ag<sub>2</sub>L<sub>2</sub>(CF<sub>3</sub>SO<sub>3</sub>)<sub>2</sub>] metallocycle

The ligand L (16mg, 0.04mmol) and AgCF<sub>3</sub>SO<sub>3</sub> (10mg, 0.04mmol) were put into CH<sub>3</sub>CN/H<sub>2</sub>O solution, and stirring this solution at room temperature for 1 hours, the white powder was obtained. ESI-MS confirmed that the metallocycle [Ag<sub>2</sub>L<sub>2</sub>(CF<sub>3</sub>SO<sub>3</sub>)<sub>2</sub>] can be synthesized quickly, the 1013 peak corresponds to [Ag<sub>2</sub>L<sub>2</sub>(CF<sub>3</sub>SO<sub>3</sub>)]<sup>+</sup> in Fig S2.

#### [Zn<sub>2</sub>L<sub>2</sub>Cl<sub>4</sub>] metallocycle

The ligand L (16mg, 0.04mmol) and ZnCl<sub>2</sub> (6mg, 0.04mmol) were put into CH<sub>3</sub>CN/

H<sub>2</sub>O solution, and stirring this solution at room temperature for 1 hours, the white powder was obtained. ESI-MS confirmed that the metallocycle [Zn<sub>2</sub>L<sub>2</sub>Cl<sub>4</sub>] can be synthesized quickly, the 885 peak corresponds to [Zn<sub>2</sub>L<sub>2</sub>Cl<sub>3</sub>]<sup>+</sup> in Fig S3.

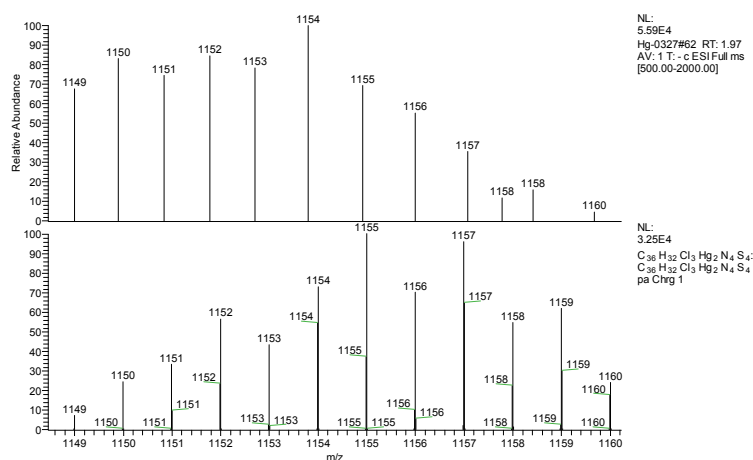

**Fig. S1** Experimental (up) and simulated (down) ESI-MS spectra of [Hg<sub>2</sub>L<sub>2</sub>Cl<sub>3</sub>]<sup>+</sup>.

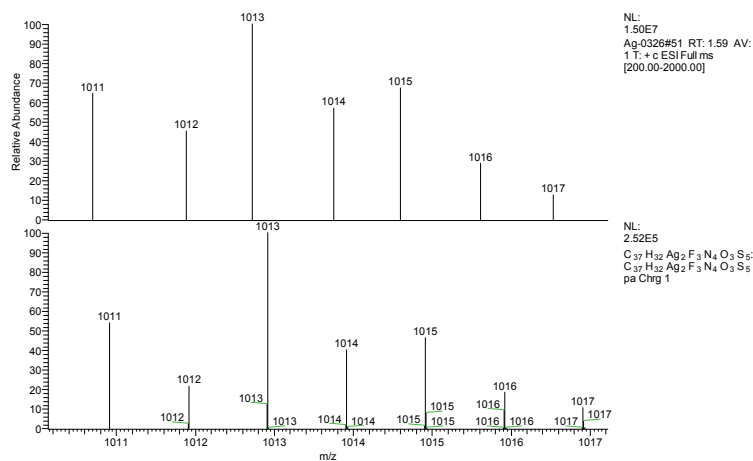

**Fig. S2** Experimental (up) and simulated (down) ESI-MS spectra of [Ag<sub>2</sub>L<sub>2</sub>(CF<sub>3</sub>SO<sub>3</sub>)]<sup>+</sup>.

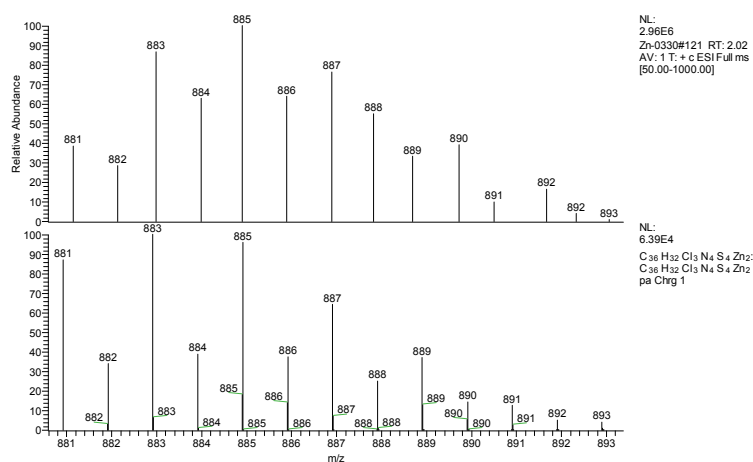

**Fig. S3** Experimental (up) and simulated (down) ESI-MS spectra of [Zn<sub>2</sub>L<sub>2</sub>Cl<sub>3</sub>]<sup>+</sup>.

**The synthesis process of compound 1**

Layering a CH<sub>3</sub>CN solution of ligand L (8mg, 0.02mmol) with a H<sub>2</sub>O solution of HgCl<sub>2</sub> (6mg, 0.02mmol), about three days later, colorless rodlike crystal compound **1** were obtained in a 50% yield. Anal. Calcd for C<sub>18</sub>H<sub>16</sub>C<sub>12</sub>HgN<sub>2</sub>S<sub>2</sub> (Mr = 595.96) n(%): C, 36.24; H, 2.68; N, 4.70; Found (%): C, 36.10; H, 2.65; N, 4.68. IR (cm<sup>-1</sup>): 3450(w), 3056(w), 1589(s), 1483(m), 1422(m), 1221(m), 1106(m), 1068(m), 1008(m), 816(m), 779(w), 749(w), 718(s), 489(m).

### **The synthesis process of compound 2**

Layering a CH<sub>3</sub>CN solution of ligand L (8mg, 0.02mmol) with a H<sub>2</sub>O solution of AgCF<sub>3</sub>SO<sub>3</sub> (5mg, 0.02mmol), about three days later, colorless rodlike crystal compound **2** were obtained in a 75% yield. Anal. Calcd for C<sub>19</sub>H<sub>19</sub>AgN<sub>2</sub>O<sub>3</sub>S<sub>3</sub>F<sub>3</sub> (Mr = 584.43) n(%): C, 39.01; H, 3.25; N, 4.79; Found (%): C, 38.97; H, 3.20; N, 4.81. IR (cm<sup>-1</sup>): 3481(w), 3150(w), 1592(s), 1488(m), 1429(m), 1275(s), 1159(m), 1114(m), 1033(s), 806(m), 728(m), 636(s), 568(w), 495(m).

### **The synthesis process of compound 3**

Layering a CH<sub>3</sub>CN solution of ligand L (8mg, 0.02mmol) with a H<sub>2</sub>O solution of ZnCl<sub>2</sub> (3mg, 0.02mmol), about three days later, colorless rodlike crystal compound **3** were obtained in a 40% yield. Anal. Calcd for C<sub>20</sub>H<sub>19</sub>N<sub>3</sub>S<sub>2</sub>ZnCl<sub>2</sub> (Mr = 501.81) n(%): C, 47.83; H, 3.79; N, 8.37; Found (%): C, 47.79; H, 3.76; N, 8.30. IR (cm<sup>-1</sup>): 3398(w), 3202(w), 1669(s), 1450(w), 1407(m), 1349(s), 1255(m), 1110(m), 1008(m), 867(w), 795(m), 649(s), 470(m).

### **X-ray crystallography**

Data collections were all performed on a Mercury CCD diffractometer with graphite monochromated Cu K $\alpha$  radiation ( $\lambda = 0.71073 \text{ \AA}$ ). The structures were solved by direct methods, and all calculations were performed using the SHELXL package. The structures **1-4** were refined by full matrix least-squares with anisotropic displacement parameters for non-hydrogen atoms. All hydrogen atoms were generated geometrically and treated as riding. The crystallographic data are summarized in Table S1-S5. CCDC 1054664, 1054665, 1054666, 1058370 contain the supplementary crystallographic data for **1-4**. These data can be obtained free of charge from The Cambridge Crystallographic Data Centre via [www.ccdc.cam.ac.uk/data\\_request/cif](http://www.ccdc.cam.ac.uk/data_request/cif).

**Table S1** Crystal data and refinement results for **1-4**.

| Formula                           | C <sub>18</sub> H <sub>16</sub> N <sub>2</sub> S <sub>2</sub> HgCl <sub>2</sub> ( <b>1</b> ) | C <sub>19</sub> H <sub>19</sub> N <sub>2</sub> S <sub>3</sub> AgO <sub>3</sub> F <sub>3</sub> ( <b>2</b> ) | C <sub>20</sub> H <sub>19</sub> N <sub>3</sub> S <sub>2</sub> ZnCl <sub>2</sub> ( <b>3</b> ) | C <sub>18</sub> H <sub>12</sub> N <sub>2</sub> S <sub>2</sub> HgI <sub>2</sub> ( <b>4</b> ) |
|-----------------------------------|----------------------------------------------------------------------------------------------|------------------------------------------------------------------------------------------------------------|----------------------------------------------------------------------------------------------|---------------------------------------------------------------------------------------------|
| Formula weight                    | 595.96                                                                                       | 584.43                                                                                                     | 501.81                                                                                       | 774.81                                                                                      |
| Crystal system                    | monoclinic                                                                                   | monoclinic                                                                                                 | monoclinic                                                                                   | monoclinic                                                                                  |
| space group                       | <i>C2/c</i>                                                                                  | <i>C2/c</i>                                                                                                | <i>P2<sub>1</sub>/c</i>                                                                      | <i>C2/c</i>                                                                                 |
| a (Å)                             | 26.6229                                                                                      | 23.7546                                                                                                    | 8.5494                                                                                       | 26.4973                                                                                     |
| b (Å)                             | 10.0005                                                                                      | 9.6388                                                                                                     | 18.8079                                                                                      | 10.4756                                                                                     |
| c (Å)                             | 13.9461                                                                                      | 18.5295                                                                                                    | 13.9638                                                                                      | 14.4782                                                                                     |
| α (°)                             | 90                                                                                           | 90                                                                                                         | 90                                                                                           | 90                                                                                          |
| β (°)                             | 93.414                                                                                       | 93.688                                                                                                     | 99.017                                                                                       | 94.642                                                                                      |
| γ (°)                             | 90                                                                                           | 90                                                                                                         | 90                                                                                           | 90                                                                                          |
| Volume (Å <sup>3</sup> )          | 3706.45                                                                                      | 4233.84                                                                                                    | 2217.58                                                                                      | 4005.61                                                                                     |
| T (K)                             | 100                                                                                          | 100                                                                                                        | 100                                                                                          | 100                                                                                         |
| Z                                 | 8                                                                                            | 8                                                                                                          | 4                                                                                            | 8                                                                                           |
| F (000)                           | 2272.0                                                                                       | 2320.0                                                                                                     | 1024.0                                                                                       | 2816.0                                                                                      |
| R1 (I>2(I))                       | 0.0358                                                                                       | 0.0280                                                                                                     | 0.0290                                                                                       | 0.0424                                                                                      |
| wR2 (reflections)                 | 0.0967                                                                                       | 0.0722                                                                                                     | 0.0722                                                                                       | 0.1167                                                                                      |
| Goodness of fit on F <sup>2</sup> | 1.066                                                                                        | 1.027                                                                                                      | 1.053                                                                                        | 1.041                                                                                       |

| Bond                    | (Å)         |
|-------------------------|-------------|
| Hg1—Cl2                 | 2.3708 (12) |
| Hg1—Cl1                 | 2.3741 (13) |
| Hg1—N2 <sup>i</sup>     | 2.393 (4)   |
| Hg1—N1                  | 2.420 (5)   |
| Angle                   | (°)         |
| Cl2—Hg1—Cl1             | 151.28 (5)  |
| Cl2—Hg1—N2 <sup>i</sup> | 102.12 (11) |
| Cl1—Hg1—N2 <sup>i</sup> | 98.90 (10)  |
| Cl2—Hg1—N1              | 97.85 (11)  |
| Cl1—Hg1—N1              | 97.42 (11)  |
| N2 <sup>i</sup> —Hg1—N1 | 100.25 (14) |

**Table S2** Selected Bond Lengths (Å) and Bond Angles (°) for compound **1**.

Symmetry codes: (i) 1-x, 1-y, 1-z.

**Table S3** Selected Bond Lengths (Å) and Bond Angles (°) for compound **2**.

| Bond                                  | (Å)         |
|---------------------------------------|-------------|
| Ag1—N2 <sup>i</sup>                   | 2.127 (2)   |
| Ag1—N1                                | 2.131 (2)   |
| Ag1—Ag1 <sup>i</sup>                  | 3.2259 (4)  |
| Angle                                 | (°)         |
| N2 <sup>i</sup> —Ag1—N1               | 170.82 (10) |
| N2 <sup>i</sup> —Ag1—Ag1 <sup>i</sup> | 82.21 (7)   |
| N1—Ag1—Ag1 <sup>i</sup>               | 102.87 (6)  |

Symmetry codes: (i) 1-x, 1-y, 1-z.

| Bond                     | (Å)         |
|--------------------------|-------------|
| Zn1—N1                   | 2.0346 (19) |
| Zn1—N2 <sup>i</sup>      | 2.0537 (19) |
| Zn1—Cl2                  | 2.2275 (6)  |
| Zn1—Cl1                  | 2.2303 (6)  |
| Angle                    | (°)         |
| N1—Zn1—N2 <sup>i</sup>   | 106.15 (7)  |
| N1—Zn1—Cl2               | 106.60 (6)  |
| N2 <sup>i</sup> —Zn1—Cl2 | 107.99 (6)  |
| N1—Zn1—Cl1               | 107.27 (5)  |
| N2 <sup>i</sup> —Zn1—Cl1 | 102.10 (6)  |
| Cl2—Zn1—Cl1              | 125.37 (2)  |

**Table S4** Selected Bond Lengths (Å) and Bond Angles (°) for compound **3**.  
Symmetry codes: (i) 1-x, 1-y, 1-z.

**Table S5** Selected Bond Lengths (Å) and Bond Angles (°) for compound **4**.

| Bond                    | (Å)         |
|-------------------------|-------------|
| Hg1—N2                  | 2.432 (7)   |
| Hg1—N1 <sup>i</sup>     | 2.441 (7)   |
| Hg1—I1                  | 2.6433 (6)  |
| Hg1—I2                  | 2.6454 (7)  |
| Angle                   | (°)         |
| N2—Hg1—N1 <sup>i</sup>  | 103.9 (2)   |
| N2—Hg1—I1               | 102.70 (16) |
| N1 <sup>i</sup> —Hg1—I1 | 100.18 (17) |
| N2—Hg1—I2               | 105.65 (15) |
| N1 <sup>i</sup> —Hg1—I2 | 97.76 (17)  |
| I1—Hg1—I2               | 141.47 (2)  |

Symmetry codes: (i) 1-x, 1-y, 1-z.
